# Supplementary material
Source: publisher figshare collection journal article supplement (https://frontiersin.figshare.com/ndownloader/files/17958128)
Supplement: Supplementary file 1 [file 17958128]

## Sheet: Sheet1
Table S1. AIC model selection results for path analyses examining factors affecting the number of young fledged in females and males from the Western and Central flyways and Eastern flyway. Fisher's C statistic = 2*ln(model likelihood). k indicates the number of parameters in each path model.
Path model equations	Fisher's C	k	AIC
Females: Standardized by flyway
migration duration~migration distance	3.35	29	61.35
breeding arrival date~migration distance+migration duration
first egg date~breeding arrival date+migration distance+migration duration
clutch size ~ first egg date+migration distance+migration duration
young fledged ~ clutch size+migration distance+breeding arrival date+first egg date+migration duration
migration duration~migration distance	4.2	28	60.2
breeding arrival date~migration distance+migration duration
first egg date~breeding arrival date+migration distance+migration duration
clutch size ~ first egg date+migration distance+migration duration
young fledged ~ clutch size+migration distance+first egg date+migration duration
migration duration~migration distance	5.96	27	59.96
breeding arrival date~migration distance+migration duration
first egg date~breeding arrival date+migration distance+migration duration
clutch size ~ first egg date+migration distance+migration duration
young fledged ~ clutch size+migration distance+migration duration
migration duration~migration distance	8.47	26	60.49
breeding arrival date~migration distance+migration duration
first egg date~breeding arrival date+migration distance+migration duration
clutch size ~ first egg date+migration distance+migration duration
young fledged ~ clutch size+migration distance
migration duration~migration distance	12.54	25	62.54
breeding arrival date~migration distance+migration duration
first egg date~breeding arrival date+migration distance+migration duration
clutch size ~ first egg date+migration distance+migration duration
young fledged ~ clutch size
migration duration~migration distance	8.51	25	58.51
breeding arrival date~migration distance+migration duration
first egg date~breeding arrival date+migration distance+migration duration
clutch size ~ first egg date+migration distance
young fledged ~ clutch size+migration distance
migration duration~migration distance	9.63	24	57.63
breeding arrival date~migration distance+migration duration
first egg date~breeding arrival date+migration distance+migration duration
clutch size ~ migration distance
young fledged ~ clutch size+migration distance
migration duration~migration distance	8.59	24	56.59
breeding arrival date~migration distance+migration duration
first egg date~breeding arrival date+migration distance+migration duration
clutch size ~ first egg date
young fledged ~ clutch size+migration distance
migration duration~migration distance	8.39	20	48.39
breeding arrival date~migration distance+migration duration
first egg date~breeding arrival date+migration distance+migration duration
young fledged ~ clutch size+migration distance
migration duration~migration distance	8.47	19	46.47
breeding arrival date~migration distance+migration duration
first egg date~breeding arrival date+migration duration
young fledged ~ clutch size+migration distance
migration duration~migration distance	11.3	18	47.3
breeding arrival date~migration distance+migration duration
first egg date~breeding arrival date
young fledged ~ clutch size+migration distance
migration duration~migration distance	11.38	17	45.38
breeding arrival date~migration duration
first egg date~breeding arrival date
young fledged ~ clutch size+migration distance
migration duration~migration distance	14.92	17	48.92
breeding arrival date~migration distance
first egg date~breeding arrival date
young fledged ~ clutch size+migration distance
migration duration~migration distance	11.43	13	37.43
first egg date~breeding arrival date
young fledged ~ clutch size+migration distance
first egg date~breeding arrival date	4.29	9	22.29
young fledged ~ clutch size+migration distance
Females: Standardized all dataset
migration duration~migration distance	2.77	29	60.77
breeding arrival date~migration distance+migration duration
first egg date~breeding arrival date+migration distance+migration duration
clutch size ~ first egg date+migration distance+migration duration
young fledged ~ clutch size+migration distance+breeding arrival date+first egg date+migration duration
migration duration~migration distance	3.35	28	59.35
breeding arrival date~migration distance+migration duration
first egg date~breeding arrival date+migration distance+migration duration
clutch size ~ first egg date+migration distance+migration duration
young fledged ~ clutch size+migration distance+first egg date+migration duration
migration duration~migration distance	6.14	27	60.14
breeding arrival date~migration distance+migration duration
first egg date~breeding arrival date+migration distance+migration duration
clutch size ~ first egg date+migration distance+migration duration
young fledged ~ clutch size+migration distance+migration duration
migration duration~migration distance	9.99	26	61.99
breeding arrival date~migration distance+migration duration
first egg date~breeding arrival date+migration distance+migration duration
clutch size ~ first egg date+migration distance+migration duration
young fledged ~ clutch size+migration distance
migration duration~migration distance	13.15	25	63.15
breeding arrival date~migration distance+migration duration
first egg date~breeding arrival date+migration distance+migration duration
clutch size ~ first egg date+migration distance+migration duration
young fledged ~ clutch size
migration duration~migration distance	10.7	25	60.7
breeding arrival date~migration distance+migration duration
first egg date~breeding arrival date+migration distance+migration duration
clutch size ~ migration distance+migration duration
young fledged ~ clutch size+migration distance
migration duration~migration distance	10.83	24	58.83
breeding arrival date~migration distance+migration duration
first egg date~breeding arrival date+migration distance+migration duration
clutch size ~ migration duration
young fledged ~ clutch size+migration distance
migration duration~migration distance	10.5	24	58.5
breeding arrival date~migration distance+migration duration
first egg date~breeding arrival date+migration distance+migration duration
clutch size ~ first egg date
young fledged ~ clutch size+migration distance
migration duration~migration distance	11.44	20	51.44
breeding arrival date~migration distance+migration duration
first egg date~breeding arrival date+migration distance+migration duration
young fledged ~ clutch size+migration distance
migration duration~migration distance	13.14	19	51.14
breeding arrival date~migration distance+migration duration
first egg date~breeding arrival date+migration distance
young fledged ~ clutch size+migration distance
migration duration~migration distance	19.99	18	55.99
breeding arrival date~migration distance+migration duration
first egg date~breeding arrival date
young fledged ~ clutch size+migration distance
migration duration~migration distance	19.93	18	55.93
breeding arrival date~migration distance+migration duration
first egg date~migration distance
young fledged ~ clutch size+migration distance
migration duration~migration distance	15.26	18	51.26
breeding arrival date~migration duration
first egg date~breeding arrival date+migration distance
young fledged ~ clutch size+migration distance
Males: Standardized by flyway
migration duration~migration distance	0.78	29	58.78
breeding arrival date~migration distance+migration duration
first egg date~breeding arrival date+migration distance+migration duration
clutch size ~ first egg date+migration distance+migration duration
young fledged ~ clutch size+migration distance+breeding arrival date+first egg date+migration duration
migration duration~migration distance	0.85	28	56.85
breeding arrival date~migration distance+migration duration
first egg date~breeding arrival date+migration distance+migration duration
clutch size ~ first egg date+migration distance+migration duration
young fledged ~ clutch size+migration distance+breeding arrival date+migration duration
migration duration~migration distance	3.51	27	57.51
breeding arrival date~migration distance+migration duration
first egg date~breeding arrival date+migration distance+migration duration
clutch size ~ first egg date+migration distance+migration duration
young fledged ~ clutch size+migration distance+migration duration
migration duration~migration distance	4.47	26	56.47
breeding arrival date~migration distance+migration duration
first egg date~breeding arrival date+migration distance+migration duration
clutch size ~ first egg date+migration distance+migration duration
young fledged ~ clutch size+migration duration
migration duration~migration distance	7.13	25	57.13
breeding arrival date~migration distance+migration duration
first egg date~breeding arrival date+migration distance+migration duration
clutch size ~ first egg date+migration distance+migration duration
young fledged ~ clutch size
migration duration~migration distance	7.56	24	55.56
breeding arrival date~migration distance+migration duration
first egg date~breeding arrival date+migration distance+migration duration
clutch size ~ first egg date+migration distance
young fledged ~ clutch size
migration duration~migration distance	9.83	23	55.83
breeding arrival date~migration distance+migration duration
first egg date~breeding arrival date+migration distance+migration duration
clutch size ~ first egg date
young fledged ~ clutch size
migration duration~migration distance	11.65	22	55.65
breeding arrival date~migration distance+migration duration
first egg date~breeding arrival date+migration duration
clutch size ~ first egg date
young fledged ~ clutch size
migration duration~migration distance	14	21	56
breeding arrival date~migration distance+migration duration
first egg date~breeding arrival date
clutch size ~ first egg date
young fledged ~ clutch size
migration duration~migration distance	15.55	20	55.55
breeding arrival date~migration duration
first egg date~breeding arrival date
clutch size ~ first egg date
young fledged ~ clutch size
breeding arrival date~migration duration	10.2	16	42.2
first egg date~breeding arrival date
clutch size ~ first egg date
young fledged ~ clutch size
Males: Standardized all dataset
migration duration~migration distance	2.59	29	60.59
breeding arrival date~migration distance+migration duration
first egg date~breeding arrival date+migration distance+migration duration
clutch size ~ first egg date+migration distance+migration duration
young fledged ~ clutch size+migration distance+breeding arrival date+first egg date+migration duration
migration duration~migration distance	4.92	28	60.92
breeding arrival date~migration distance+migration duration
first egg date~breeding arrival date+migration distance+migration duration
clutch size ~ first egg date+migration distance+migration duration
young fledged ~ clutch size+migration distance+first egg date+migration duration
migration duration~migration distance	5.64	27	59.64
breeding arrival date~migration distance+migration duration
first egg date~breeding arrival date+migration distance+migration duration
clutch size ~ first egg date+migration distance+migration duration
young fledged ~ clutch size+migration distance+migration duration
migration duration~migration distance	8.59	26	60.59
breeding arrival date~migration distance+migration duration
first egg date~breeding arrival date+migration distance+migration duration
clutch size ~ first egg date+migration distance+migration duration
young fledged ~ clutch size+migration distance
migration duration~migration distance	11.61	25	61.61
breeding arrival date~migration distance+migration duration
first egg date~breeding arrival date+migration distance+migration duration
clutch size ~ first egg date+migration distance + migration duration
young fledged ~ clutch size
migration duration~migration distance	11.93	24	59.93
breeding arrival date~migration distance+migration duration
first egg date~breeding arrival date+migration distance+migration duration
clutch size ~ first egg date+migration distance
young fledged ~ clutch size
migration duration~migration distance	16.92	23	62.92
breeding arrival date~migration distance+migration duration
first egg date~breeding arrival date+migration distance+migration duration
clutch size ~ migration distance
young fledged ~ clutch size
migration duration~migration distance	21.07	23	67.07
breeding arrival date~migration distance+migration duration
first egg date~breeding arrival date+migration distance+migration duration
clutch size ~ first egg date
young fledged ~ clutch size
migration duration~migration distance	14.16	23	60.16
breeding arrival date~migration distance+migration duration
first egg date~breeding arrival date+migration distance
clutch size ~ first egg date+ migration distance
young fledged ~ clutch size
migration duration~migration distance	20.49	22	64.49
breeding arrival date~migration distance+migration duration
first egg date~breeding arrival date
clutch size ~ first egg date+ migration distance
young fledged ~ clutch size
migration duration~migration distance	15.45	22	59.45
breeding arrival date~migration duration
first egg date~breeding arrival date+migration distance
clutch size ~ first egg date+ migration distance
young fledged ~ clutch size
